# Supplementary material for: Novel template-free solvothermal synthesis of mesoporous Li4Ti5O12-C microspheres for high power lithium ion batteries
Source: Royal Society of Chemistry journal article supplement (doi:10.1039/c1jm12324f), 2011-01-01
Supplement: c1jm12324f.pdf [file c1jm12324f.pdf]

Supplementary material (ESI) for Journal of Materials Chemistry  
This journal is © The Royal Society of Chemistry 2011

## Electronic Supplementary Information (ESI)

### Novel template-free solvothermal synthesis of mesoporous $\text{Li}_4\text{Ti}_5\text{O}_{12}$ -C microspheres for high power lithium ion batteries

Laifa Shen, Changzhou Yuan, Hongjun Luo, Xiaogang Zhang,\* Lin Chen  
and Hongsen Li

College of Material Science & Engineering, Nanjing University of Aeronautics and  
Astronautics, Nanjing, 210016, P.R. China.

E-mail: azhangxg@163.com

#### Experimental

##### 1. Preparation of $\text{Li}_4\text{Ti}_5\text{O}_{12}$ -C microspheres and pure $\text{Li}_4\text{Ti}_5\text{O}_{12}$ :

In a typical synthesis, 1.2 ml tetrabutyl titanate (TBT, 98%), 1.0 ml furfural and 2.5 g  $\text{CH}_3\text{COOLi}\cdot 2\text{H}_2\text{O}$  were dissolved in 60 ml ethanol with stirring. The resulting solution was then transferred into a Teflon-lined autoclave and kept at 180 °C for 24 h. The resulting brown precipitate was separated by filtration, washed several times with deionized water to remove the excess hydroxides before drying at 80 °C for 6 h. Subsequently, the brown powder was calcinated at 550 °C for 2 h in a nitrogen atmosphere to obtain  $\text{Li}_4\text{Ti}_5\text{O}_{12}$ -C microspheres. The pure  $\text{Li}_4\text{Ti}_5\text{O}_{12}$  was prepared in a similar manner to the preparation of  $\text{Li}_4\text{Ti}_5\text{O}_{12}$ -C microspheres, except for the absence of furfural in the process.

##### 2. Sample characterization:

The crystal structure of the obtained samples was characterized by X-ray diffraction (XRD) (Bruker D8 advance) with Cu K $\alpha$  radiation. Microstructural properties were obtained using transmission electron microscopy (TEM) (TEM, FEI, Tecnai-20, USA), energy-dispersive X-ray spectroscopy (EDX, Phoenix), high-resolution transmission electron microscopy (HRTEM, JEOL JEM-2010), and field-emission scanning electron microscopy (FESEM, LEO 1430VP, Germany). The  $\text{N}_2$

adsorption/desorption determined by Brunauer Emmett-Teller (BET) measurements using an ASAP-2010 surface area analyzer. Thermogravimetric (TG) analyses were performed on a TG instrument (NETZSCH STA 409 PC) using a heating rate of 10 °C min<sup>-1</sup> in air atmosphere from 30 °C to 600 °C.

### 3. Electrochemical experiments:

The electrochemical characterization was carried out by galvanostatic cycling in a CR2016-type coin cell. The working electrodes were prepared by a slurry coating procedure. In brief, the slurry consisted of 80 wt.% active material, 10 wt.% acetylene black and 10 wt.% polyvinylidene fluoride (PVDF) dissolved in N-methyl pyrrolidinone (NMP), and was spread uniformly on an aluminium foil current collector. Finally, the electrode was dried under vacuum at 110 °C for 12 h. Test cells were assembled in an argon-filled glove box using Li foil as the counter electrode and polypropylene (PP) film as the separator. 1 mol L<sup>-1</sup> LiPF<sub>6</sub> solution in a 1 : 1 (V : V) mixture of ethylene carbonate (EC) and dimethyl carbonate (DMC) was used as electrolyte. The cells were galvanostatically charged and discharged under different current densities between 1.0 and 2.5 V (vs. Li/Li<sup>+</sup>) using a CT2001A cell test instrument (LAND Electronic Co.). The AC impedance spectrum was measured by using a Solatron 1260 Impedance Analyzer in the frequency range 10<sup>-2</sup> ~ 10<sup>6</sup> Hz.

### Sample Characterizations

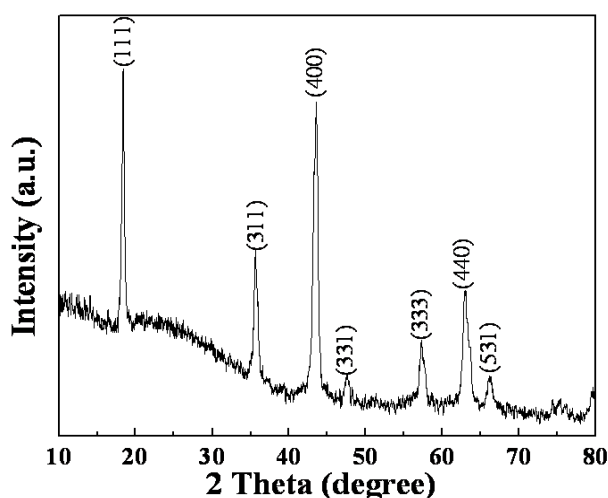

Fig. S1 X-ray diffraction patterns of pure Li<sub>4</sub>Ti<sub>5</sub>O<sub>12</sub>

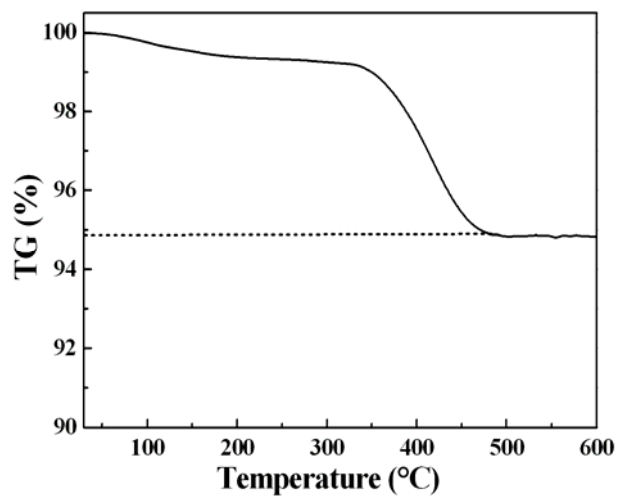

**Fig. S2** TG curve of the mesoporous  $\text{Li}_4\text{Ti}_5\text{O}_{12}\text{-C}$  microspheres at  $10\text{ }^\circ\text{C min}^{-1}$  under air. The residual weight ratio corresponds to the content of  $\text{Li}_4\text{Ti}_5\text{O}_{12}$  in the hybrid materials.

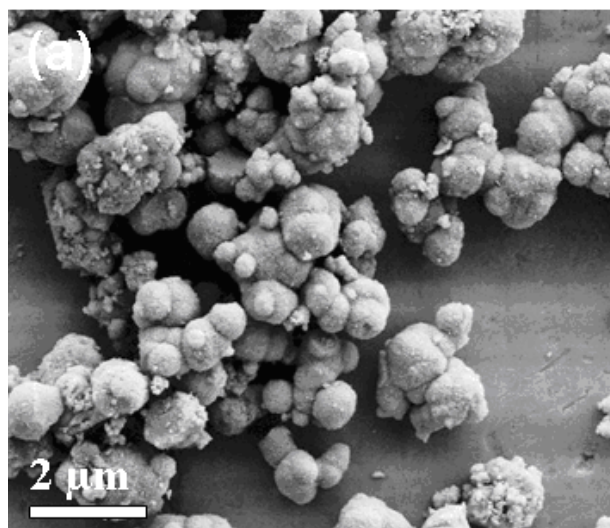

**Fig. S3** FESEM image of pure  $\text{Li}_4\text{Ti}_5\text{O}_{12}$ .

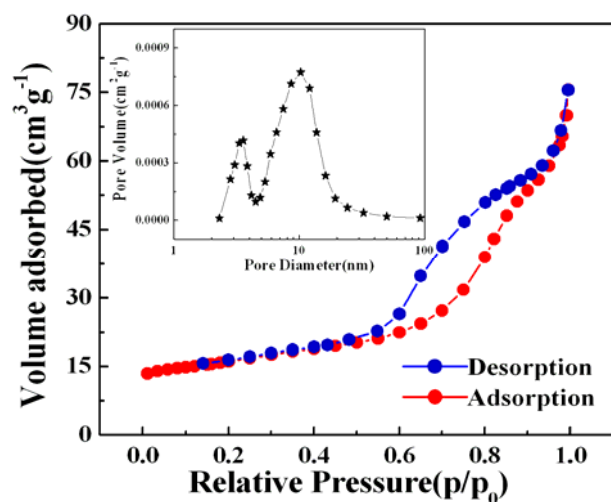

**Fig. S4** N<sub>2</sub> adsorption/desorption isotherm of the as-prepared Li<sub>4</sub>Ti<sub>5</sub>O<sub>12</sub>. The inset shows the pore size distributions calculated using the BJH method.

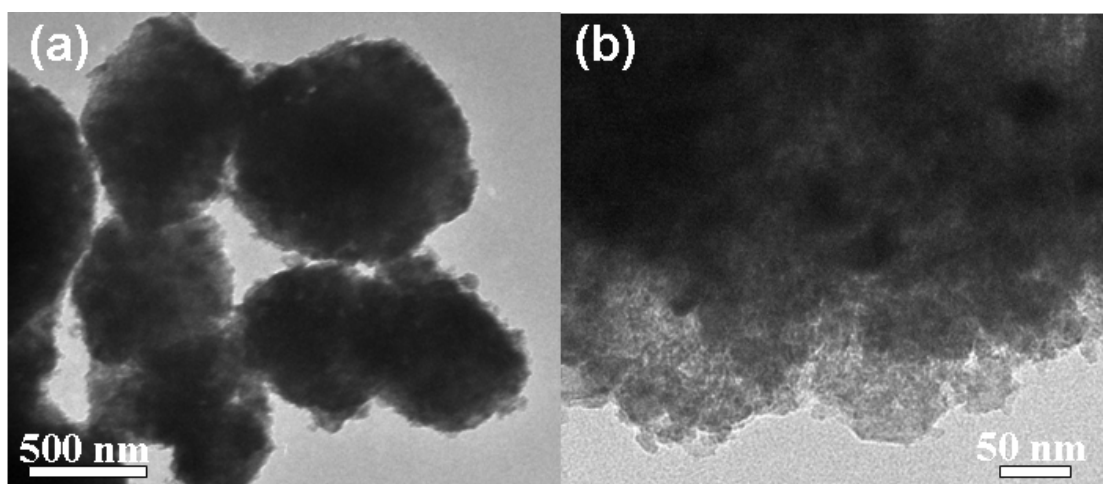

**Fig. S5** TEM images of pure Li<sub>4</sub>Ti<sub>5</sub>O<sub>12</sub>.

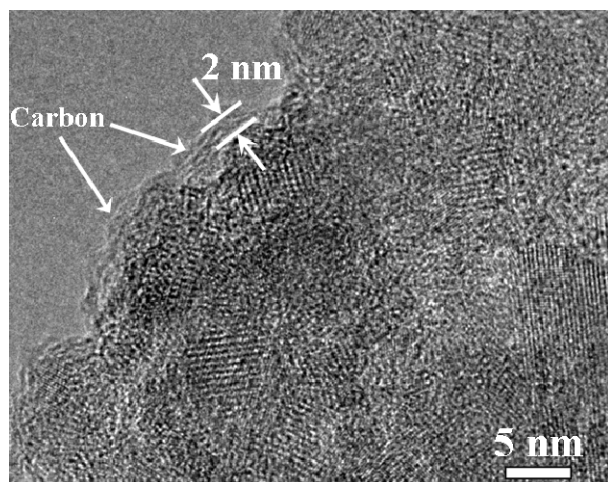

**Fig. S6** HRTEM image of mesoporous Li<sub>4</sub>Ti<sub>5</sub>O<sub>12</sub>-C microspheres.

**Table 1** Impedance parameters of the pure  $\text{Li}_4\text{Ti}_5\text{O}_{12}$  and mesoporous  $\text{Li}_4\text{Ti}_5\text{O}_{12}\text{-C}$  microspheres electrodes.

| Samples                                        | $R_s$ ( $\Omega$ ) | $R_{ct}$ ( $\Omega$ ) | $i^0$ ( $\text{mA cm}^{-2}$ ) |
|------------------------------------------------|--------------------|-----------------------|-------------------------------|
| $\text{Li}_4\text{Ti}_5\text{O}_{12}$          | 4.2                | 138.7                 | 0.19                          |
| $\text{Li}_4\text{Ti}_5\text{O}_{12}\text{-C}$ | 2.1                | 49.3                  | 0.52                          |
